# Supplementary material
Source: PubMed Central journal article supplement (PMC5095409)
Supplement: 10.1074_M116.742460_jbc.M116.742460-1.pdf [file 10.1074_M116.742460_jbc.M116.742460-1.pdf]

## Supplementary Information

### **Inhibition of Insulin Amyloid Fibrillation by a Novel Amphipathic Heptapeptide: Mechanistic Details Studied by Spectroscopy in Combination With Microscopy**

Bhisma N Ratha,<sup>1</sup> Anirban Ghosh,<sup>1</sup> Jeffrey R. Brender,<sup>3</sup> Nilanjan Gayen,<sup>2</sup> Humaira Ilyas,<sup>1</sup> Chilukoti Neeraja,<sup>4</sup> Kali P Das,<sup>5</sup> Atin K Mandal,<sup>2</sup> Anirban Bhunia<sup>1,\*</sup>

<sup>1</sup>Department of Biophysics, Bose Institute, P-1/12 CIT Scheme VII (M), Kolkata 700054, India

<sup>2</sup>Department of Molecular Medicine, Bose Institute, P-1/12 CIT Scheme VII (M), Kolkata 700054, India

<sup>3</sup>Radiation Biology Branch, National Institutes of Health, Bethesda, MD 20814, USA

<sup>4</sup>TIFR Centre for Interdisciplinary Sciences (TCIS), Narsingi, Hyderabad, India

<sup>5</sup>Department of Chemistry, 93/1 APC Road, Bose Institute, Kolkata 700009, India

\*To whom correspondence should be addressed:

Anirban Bhunia, Bose Institute, P-1/12 CIT Scheme VII (M), Kolkata 700054, India; Tel: +91-33-25693336; E-mail: [anirbanbhunia@gmail.com](mailto:anirbanbhunia@gmail.com) and [bhunias@jcbose.ac.in](mailto:bhunias@jcbose.ac.in)

**Table S1: Time parameters of Insulin amyloid fibrillation:** Lag time and Half time of the insulin amyloid fibrillation in presence and absence of different concentration of KR7 peptides.

| Sample                | Lag Time (minutes) | T <sub>1/2</sub> (minutes) |
|-----------------------|--------------------|----------------------------|
| Insulin Control       | 94.1±0.6           | 113.53±0.8                 |
| Insulin + KR7 (1:1)   | 95.2±2.1           | 144.5±3.4                  |
| Insulin + KR7 (1:0.5) | 98.1±1.8           | 126.1±2.7                  |

**Table S2: Qualitative analysis of chemical shift perturbation (CSP) of insulin in presence of equimolar concentration of peptide KR7 (insulin:KR7 =1:1) acquired from NOESY experiment. The symbol + indicates less CSP and ++ indicates higher CSP.**

| Residue                | CSP |
|------------------------|-----|
| <b>Insulin Chain A</b> |     |
| Ser12                  | +   |
| Leu13                  | +   |
| Leu16                  | +   |
| Tyr19                  | +   |
| Cys20                  | +   |
| <b>Insulin Chain B</b> |     |
| Leu11                  | +   |
| Val12                  | ++  |
| Glu13                  | ++  |
| Ala14                  | ++  |
| Leu15                  | ++  |
| Tyr16                  | +   |
| Leu17                  | ++  |
| Val18                  | ++  |
| Gly20                  | +   |
| Gly23                  | ++  |
| Glu21                  | ++  |
| Phe24                  | +   |
| Tyr26                  | +   |
| Thr27                  | ++  |

**Table S3: Details of interacting partner from peptide KR7 and insulin protein conferred from docked structures:** The nature of interaction and distance between KR7 and insulin, obtained from HADDOCK.

| KR7 residues | Insulin residue |       | Nature of interaction     | Inter-atomic distance (Å) |
|--------------|-----------------|-------|---------------------------|---------------------------|
|              | Residue         | Chain |                           |                           |
| Lys1         | Glu21           | B     | Electrostatic Interaction | 2.5                       |
| Lys1         | Leu17           | B     | Electrostatic Interaction | 2.1                       |
| Lys1         | Tyr16           | B     | Electrostatic Interaction | 2.4                       |
| Trp3         | Tyr16           | B     | Hydrophobic Interaction   | 3.2                       |
| Trp4         | Gly20           | B     | Electrostatic Interaction | 1.7                       |
| Trp4         | Phe24           | B     | Hydrophobic Interaction   | 4.1                       |
| Arg6         | Glu13           | B     | Electrostatic Interaction | 1.8                       |
| Arg7         | Tyr26           | B     | Electrostatic Interaction | 1.8                       |

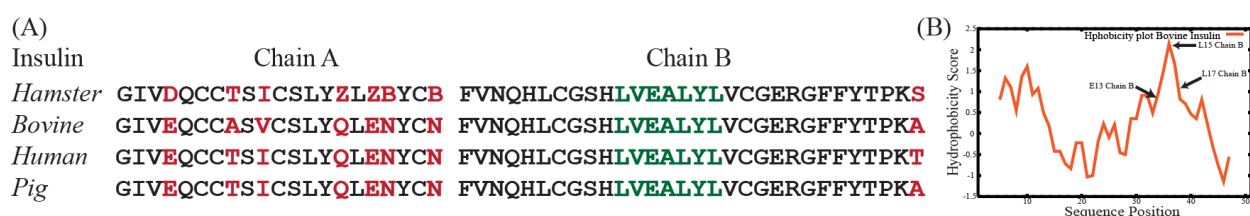

**Figure S1:** Mammalian insulin sequence; A) Aligned sequence of mammalian insulin, amino acids represented in conventional single letter code, black letters indicate conserved residues while red indicates non-conserved residues, the green letters indicate conserved residues reported to be important in amyloid fibrillation event. B) Hydrophobicity plot (ProtScale server) of bovine insulin showing E13 to L17 of chain B as the most hydrophobic region as indicated by arrows.

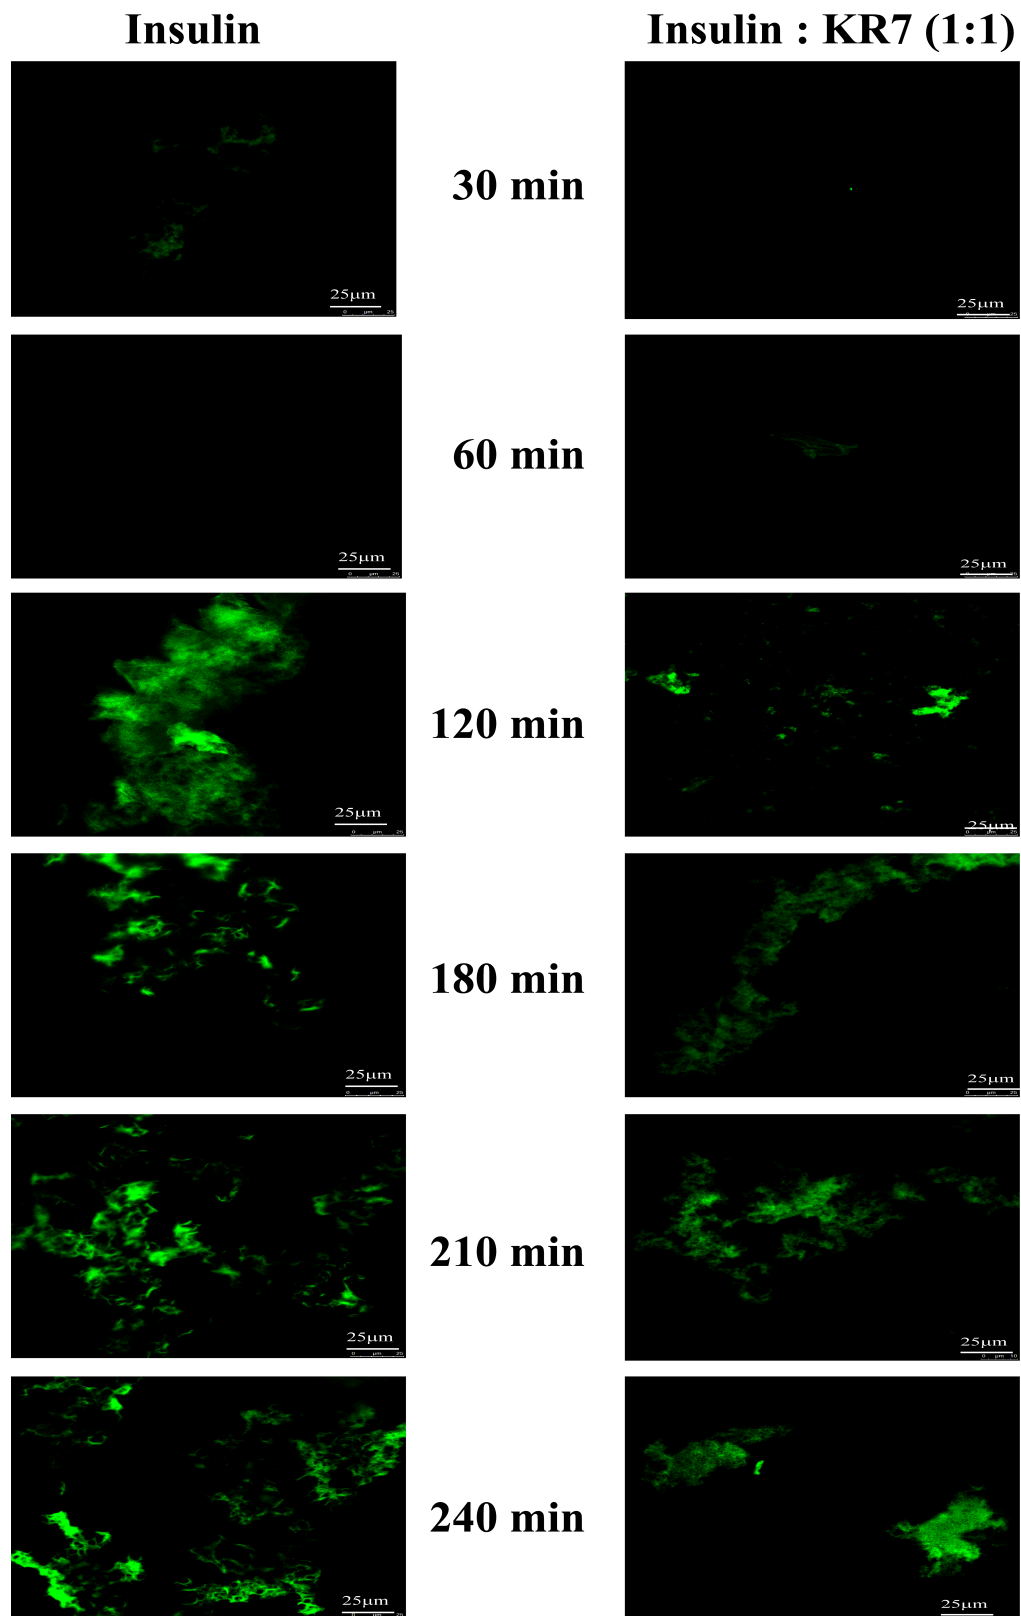

**Figure S2: Confocal images of insulin fibrillation by ThT fluorescence:** Fluorescence confocal images of insulin amyloids recorded at different time points in the course of insulin fibrillation in the presence (1:1) and absence of KR7 peptide.

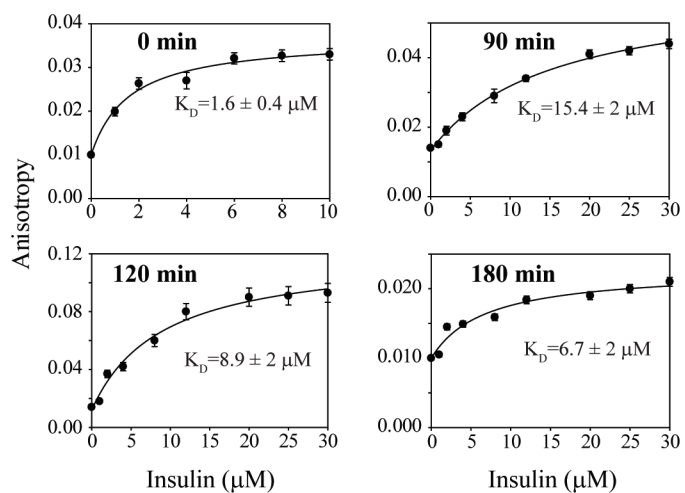

**Figure S3: Fluorescence anisotropy measurements of the binding of KR7 to insulin at different time points.** Anisotropy of the tryptophan fluorescence of 5 μM KR7 peptide in 10 mM sodium phosphate buffer containing 100 mM NaCl (pH 7.4) with gradual addition of insulin from 1 μM to 20 μM concentration from a 2 mg/mL stock solution in 50 mM citrate phosphate, 100 mM NaCl, pH 2.6 aggregated at 335 K for the indicated time period.

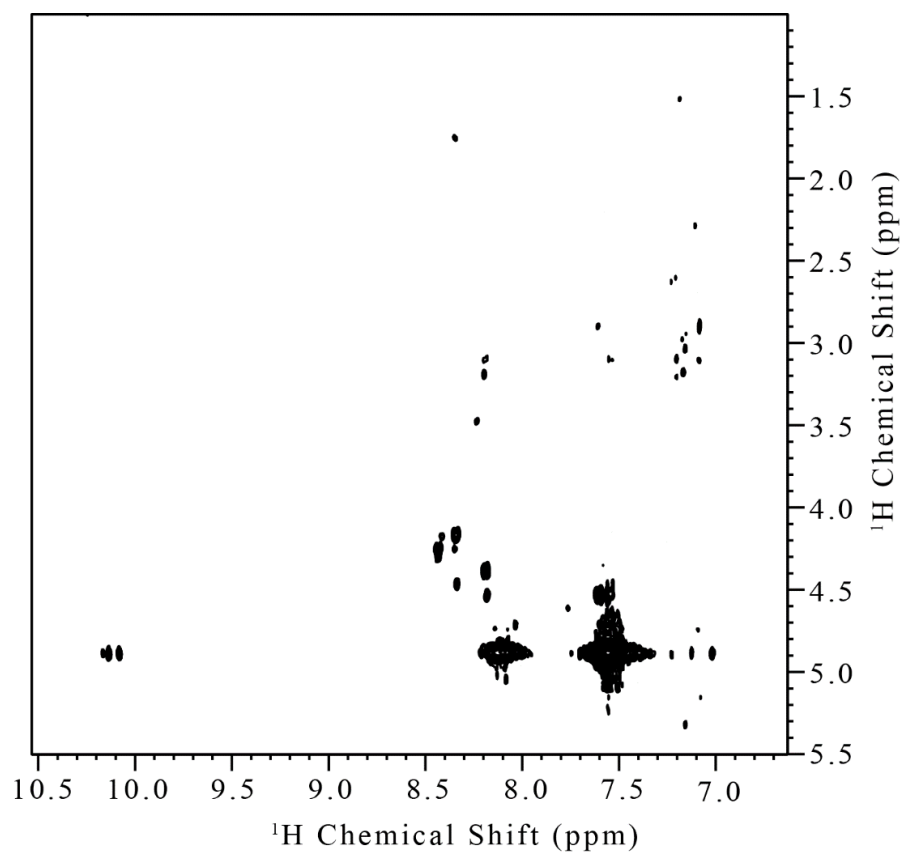

**Figure S4:** The finger print region of the 2D  $^1\text{H}$ - $^1\text{H}$  *tr*NOESY spectra (Bruker Avance III 500 MHz NMR spectrometer, 150ms NOESY mixing time) of KR7 in the context of insulin, recorded at 298 K and at pH 2.6 (adjusted with HCl) with 100 mM NaCl.

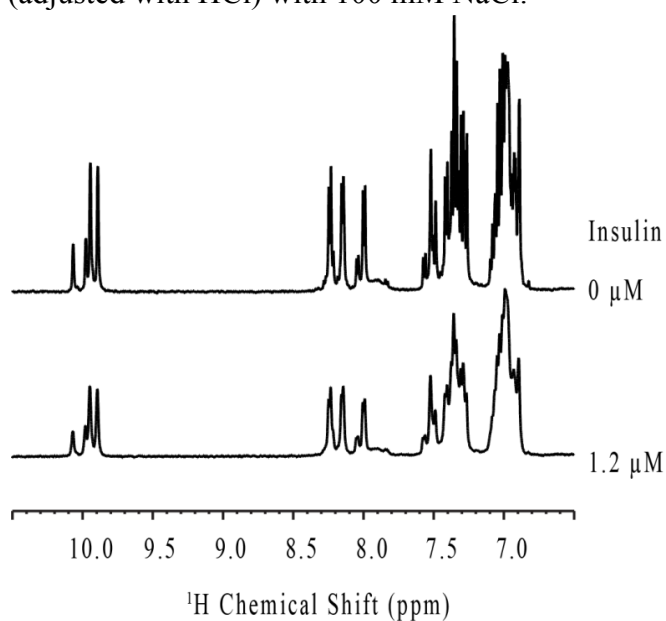

**Figure S5:** Selected region of one-dimensional  $^1\text{H}$  NMR spectra of 1mM KR7 recorded at 298 K using Bruker Avance III 500 MHz spectrometer, showing the line width broadening in the aromatic and amide region upon addition of insulin.
